# Supplementary figures and images for: Complete Chloroplast Genome Sequence of Sonchus brachyotus Helps to Elucidate Evolutionary Relationships with Related Species of Asteraceae
Source: Hindawi journal article supplement (doi:10.1155/2021/9410496), 2021-01-01

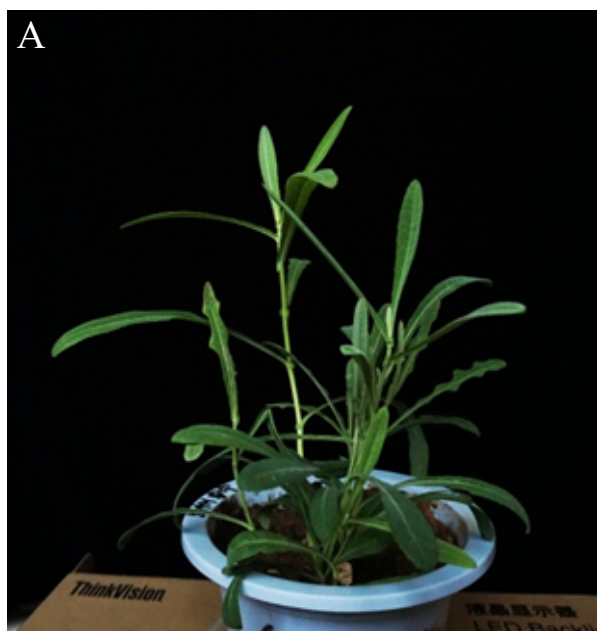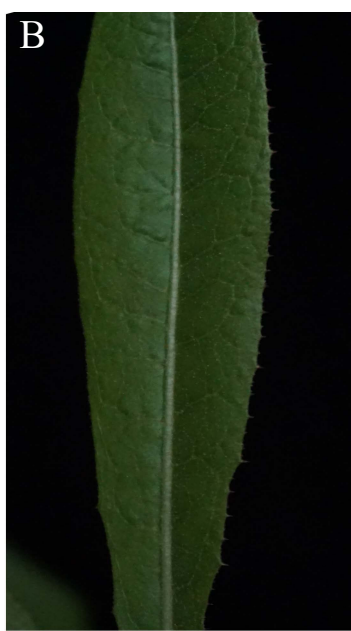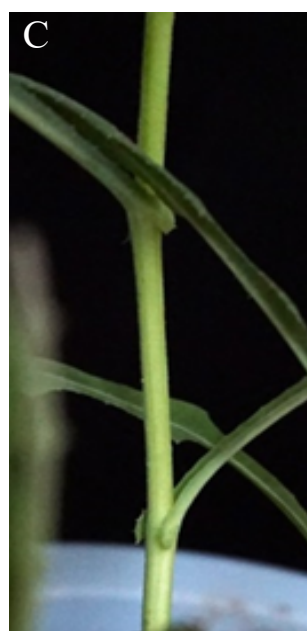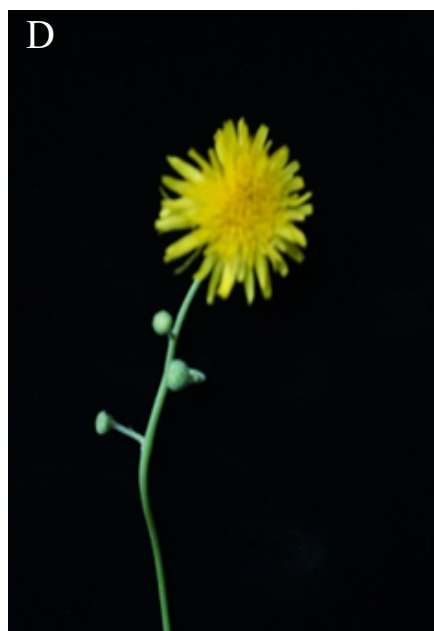

Supplement: f1 [file 9410496.f1.zip]
